# Supplementary material for: Ultrahigh ferroelectric response in Fe modified 0.95(Na1/2Bi1/2)TiO3-0.05BaTiO3 single crystals
Source: Royal Society of Chemistry journal article supplement (doi:10.1039/c4tc01814a), 2014-01-01
Supplement: c4tc01814a1.pdf [file c4tc01814a1.pdf]

**Ultrahigh ferroelectric response in Fe modified  $0.95(\text{Na}_{1/2}\text{Bi}_{1/2})\text{TiO}_3\text{-}0.05\text{BaTiO}_3$   
single crystals**

Haiwu Zhang<sup>a,b\*</sup>, Chao Chen<sup>a, b</sup>, Hao Deng<sup>a, b</sup>, Bo Ren<sup>a</sup>, Xiangyong Zhao<sup>a</sup>, Di Lin<sup>a</sup>, Xiaobing Li<sup>a</sup>,  
Haosu Luo<sup>a\*</sup>

*<sup>a</sup> Key Laboratory of Inorganic Functional Materials and Devices, Shanghai Institute of Ceramics, Chinese Academy of Sciences, 215 Chengbei Road, Jiading, Shanghai 201800, China*

*<sup>b</sup> Graduate University of Chinese Academy of Sciences, Beijing, 100049, China*

\*E-mail address: [zhw3789@sina.com](mailto:zhw3789@sina.com), and [hsluo@mail.sic.ac.cn](mailto:hsluo@mail.sic.ac.cn)

## Ferroelectric properties of pure NBBT5 single crystals.

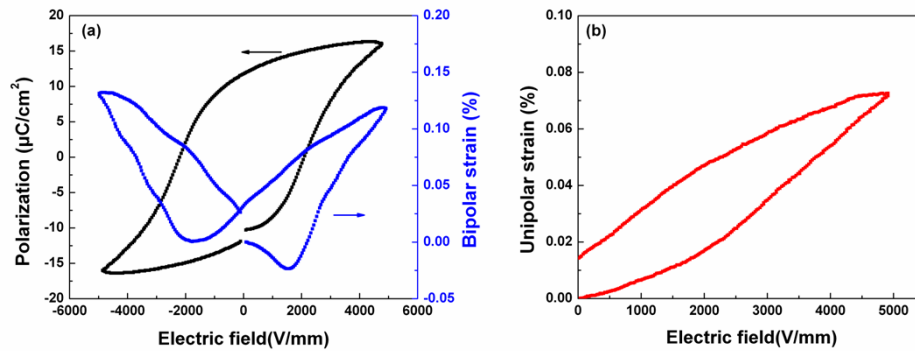

Fig. **s1**. Ferroelectric properties of pure NBBT5 single crystals: (a) the polarization-electrical field ( $P$ - $E$ ) hysteresis loop and bipolar strain-electrical field ( $S$ - $E$ ) curve; (b) unipolar strain-electrical field ( $\varepsilon$ - $E$ ) curves.

Fig. **s1** shows  $P$ - $E$  hysteresis loop and bipolar strain-electrical field ( $S$ - $E$ ) curve for pure NBBT5 single crystal. The values of  $P_r$ ,  $E_c$  and  $S_{\max}$  are  $11.8 \mu\text{C}/\text{cm}^2$ ,  $2.2 \text{ kV}/\text{mm}$  and  $0.12$ , respectively. With respect to iron doped single crystals, the  $P$ - $E$  hysteresis is not well saturated and the  $S$ - $E$  curve is not asymmetric, which may be mainly attributed to the relative large leakage current density. Similar phenomena were also observed in NBT-BT single crystals grown using other methods.<sup>1-3</sup> Besides, an anhysteretic  $\varepsilon$ - $E$  curve was observed for pure NBBT5 single crystals. The values of normalized strain  $\varepsilon_{\max}/E_{\max}$  is  $249.6 \text{ pm}/\text{V}$ .

## Reference

1. K.-S. Moon, D. Rout, H.-Y. Lee, S.-J. L. Kang, *J. Cryst. Growth*, 2011, **317**, 28-31.
2. Y.-M. Chiang, G. W. Farrey, A. N. Soukhojak, *Appl. Phys. Lett.* 1998, **73**, 3683.
3. J. B. Babu, M. He, D. F. Zhang, X. L. Chen, and R. Dhanasekaran, *Appl. Phys. Lett.*, 2007, **90**, 102901.
